# Supplementary material for: The Use of Recycled Polymers for the Preparation of Self-Reinforced Composites by the Overmolding Technique: Materials Performance Evaluation
Source: MDPI journal article supplement (doi:10.3390/su151411318), 2023-07-20
Supplement: s1 [file s1]

## The use of recycled polymers for the preparation of self-reinforced composites by the overmolding technique: materials performance evaluation

Jacek Andrzejewski<sup>1\*</sup>

<sup>1</sup> Institute of Materials Technology, Faculty of Mechanical Engineering, Poznan University of Technology, ul. Piotrowo 3, 61-138 Poznan, Poland; (J.A.) jacek.andrzejewski@put.poznan.pl

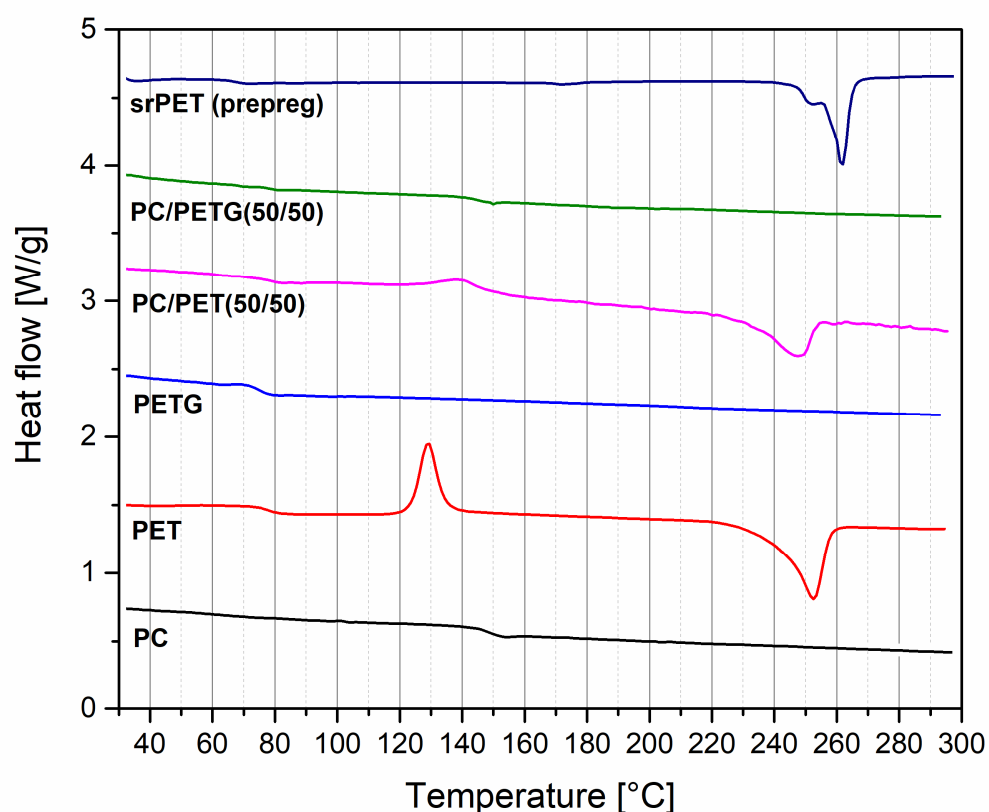

Fig. S1. The DSC 1<sup>st</sup> heating stage thermograms for overmolded materials and srPET prepreg.

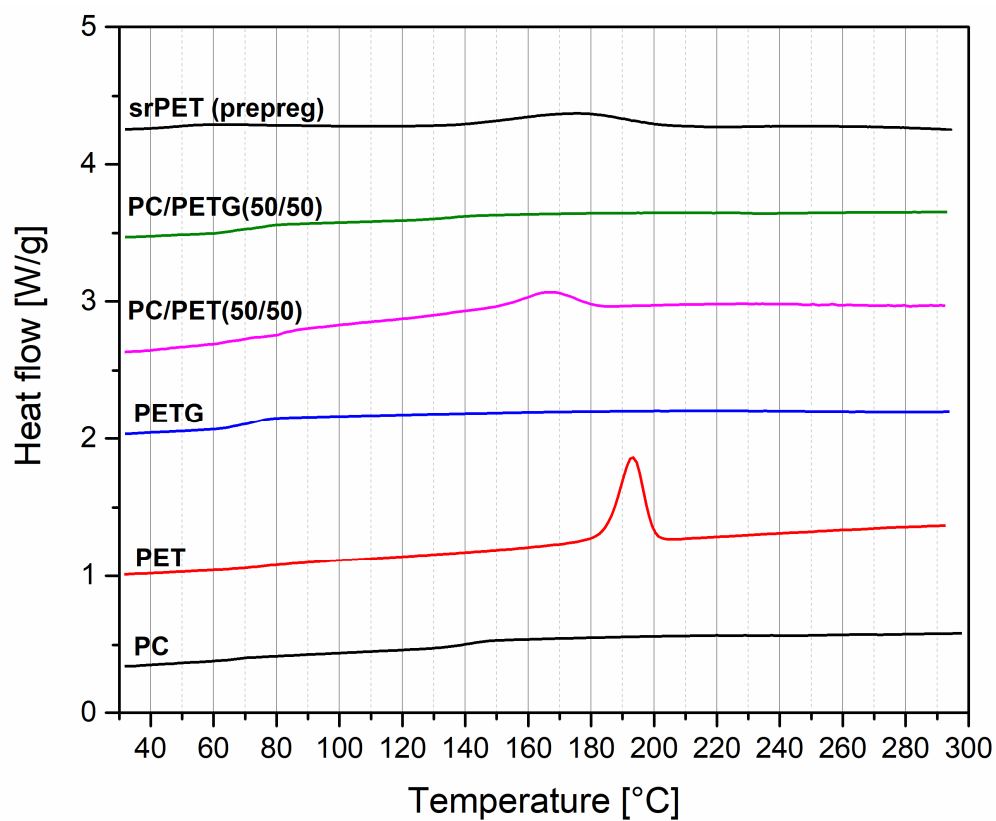

Fig. S2. The DSC cooling stage thermograms for overmolded materials and srPET prepreg.

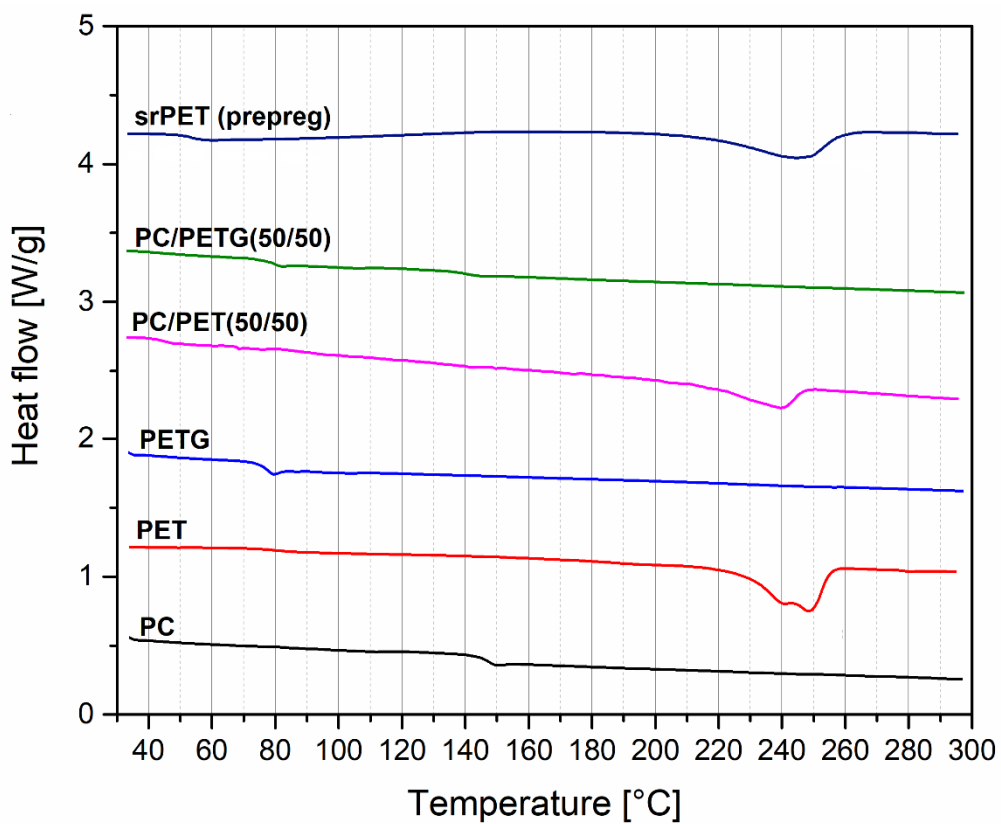

Fig. S3. The DSC 2<sup>nd</sup> stage heating thermograms for overmolded materials and srPET prepreg.
